# Supplementary material for: [Cr(dmbipy)(ox)2]−: a new bis-oxalato building block for metal assembling. Crystal structures and magnetic properties of XPh4[Cr(dmbipy)(ox)2]·5H2O (X = P and As), {Ba(H2O)2[Cr(dmbipy)(ox)2]2}n·17/2nH2O and {Ag(H2O)[Cr(dmbipy)(ox)2]}n·3nH2O
Source: Royal Society of Chemistry journal article supplement (doi:10.1039/b914419f), 2009-09-22
Supplement: b914419f.pdf [file b914419f.pdf]

## Supporting Information

**[Cr(dmbipy)(ox)<sub>2</sub>]<sup>-</sup>: a new bis-oxalato building block for metal assembling. Crystal structures and magnetic properties of XPh<sub>4</sub>[Cr(dmbipy)(ox)<sub>2</sub>] · 5H<sub>2</sub>O (X = P and As), {Ba(H<sub>2</sub>O)<sub>2</sub>[Cr(dmbipy)(ox)<sub>2</sub>]<sub>2</sub>}<sub>n</sub> · 17/2nH<sub>2</sub>O and {Ag(H<sub>2</sub>O)[Cr(dmbipy)(ox)<sub>2</sub>]<sub>n</sub> · 3nH<sub>2</sub>O**

**Marta Viciano-Chumillas,<sup>a</sup> Nadia Marino,<sup>b</sup> Iván Sorribes,<sup>c</sup> Cristian Vicent,<sup>d</sup> Francesc Lloret,<sup>e</sup> and Miguel Julve<sup>\*,e</sup>**

<sup>a</sup>*Gorlaeus Laboratories, Leiden Institute of Chemistry, Leiden University, PO Box 9502, 2300 RA Leiden, The Netherlands*

<sup>b</sup>*Dipartimento di Chimica, Università della Calabria, via P. Bucci, 14/c, 87036 Rende, Cosenza, Italy*

<sup>c</sup>*Departament de Química Física i Analítica, Universitat Jaume I, Avda. Sos Baynat s/n, 12080 Castelló, Spain*

<sup>d</sup>*Serveis Central d'Instrumentació Científica, Universitat Jaume I, Avda. Sos Baynat s/n, 12080 Castelló, Spain*

<sup>e</sup>*Instituto de Ciencia Moleculuar (ICMol)/Departament de Química Inorgànica, Universitat de València, Polígono La Coma s/n, 46980 Paterna, València Spain*

**Fig. S1** Perspective view of the [Cr(dmbipy)(ox)<sub>2</sub>]<sup>-</sup> anion of **1** showing the atom numbering. The hydrogen atoms other than those of the methyl groups were omitted for clarity.

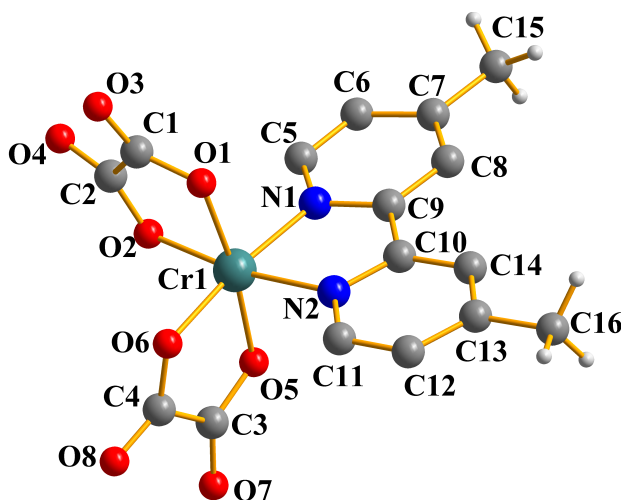

**Fig. S2** A view showing the SPE and DPE supramolecular interactions between the  $\text{PPh}_4^+$  cations in **2**. Regular alternating SPE interactions occur along  $b$  with  $\text{P}(1)\cdots\text{P}(1k) = 6.143(2) \text{ \AA}$  and  $\text{P}(1)\cdots\text{P}(1j) = 6.552(2) \text{ \AA}$  whereas two DPE interactions develop along the  $[210]$  direction with  $\text{P}(1)\cdots\text{P}(1l) = 9.153(3) \text{ \AA}$  and  $\text{P}(1j)\cdots\text{P}(1m) = 10.890(4) \text{ \AA}$  [symmetry code: (j) =  $-x, 1-y, -z$ ; (k) =  $-x, 2-y, -z$ ; (l) =  $1-x, 2-y, -z$ ; (m) =  $1+x, y, z$ ].

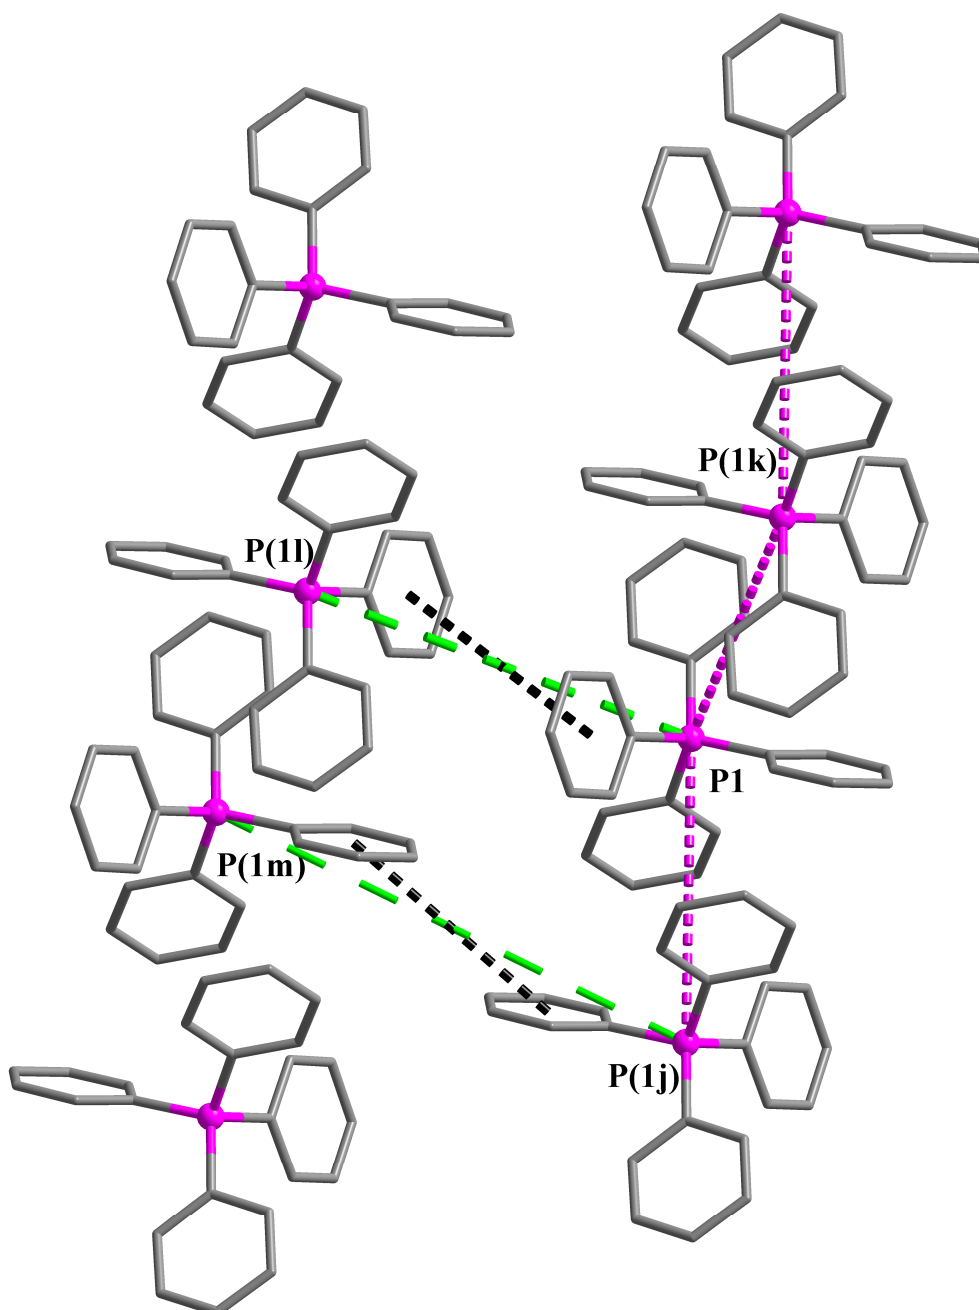

**Table S1** Hydrogen-bonding interactions in **1**<sup>a,b</sup>

| D–H···A        | D···A/Å  |
|----------------|----------|
| O(3)···O(1Wc)  | 3.117(5) |
| O(3)···O(2Wc)  | 3.004(5) |
| O(3)···O(5Wc)  | 2.818(8) |
| O(4)···O(1Wc)  | 3.191(5) |
| O(4)···O(3Wd)  | 3.027(6) |
| O(7)···O(1W)   | 2.907(4) |
| O(7)···O(2W)   | 2.868(4) |
| O(3W)···O(5W)  | 2.716(8) |
| O(3W)···O(4We) | 3.018(7) |
| O(4W)···O(1W)  | 2.892(7) |
| O(4W)···O(5W)  | 2.925(9) |

<sup>a</sup> D = Donor, A = Acceptor. <sup>b</sup> Symmetry code: (c) = -x, 1+y, z; (d) = 1+x, 1+y, z; (e) = 1-x, 1-y, 1-z.

**Table S2** Hydrogen-bonding interactions in **3**<sup>a,b</sup>

| D–H···A         | D···A/Å   |
|-----------------|-----------|
| O(1W)···O(2W)   | 2.746(12) |
| O(1W)···O(8W)   | 2.696(14) |
| O(1W)···O(10W)  | 3.147(15) |
| O(1W)···O(4We)  | 2.772(9)  |
| O(2W)···O(12b)  | 2.810(9)  |
| O(2W)···O(17)   | 3.233(10) |
| O(2W)···O(3We)  | 2.690(9)  |
| O(3W)···O(4W)   | 2.771(8)  |
| O(3W)···O(6W)   | 2.962(7)  |
| O(4W)···O(8)    | 2.888(7)  |
| O(5W)···O(3)    | 2.809(7)  |
| O(5W)···O(7b)   | 3.124(7)  |
| O(5W)···O(17b)  | 2.852(8)  |
| O(5W)···O(5Wd)  | 2.713(8)  |
| O(6W)···O(4a)   | 2.866(7)  |
| O(6W)···O(18)   | 2.875(6)  |
| O(6W)···O(15d)  | 2.995(7)  |
| O(7W)···O(13)   | 2.815(6)  |
| O(7W)···O(18)   | 3.042(4)  |
| O(8W)···O(11W)  | 2.60(2)   |
| O(8W)···O(14)   | 2.790(14) |
| O(8W)···O(17)   | 2.763(15) |
| O(9W)···O(5a)   | 2.840(10) |
| O(9W)···O(11W)  | 2.56(2)   |
| O(9W)···O(14)   | 2.778(11) |
| O(10W)···O(11W) | 2.09(2)   |
| O(10W)···O(17)  | 3.184(12) |
| O(10W)···O(1f)  | 3.144(12) |

<sup>a</sup> D = Donor, A = Acceptor. <sup>b</sup> Symmetry codes: (a) = x, 1+y, z; (b) = x, 1–y, z; (c) = –x, y, 1/2–z; (d) = 1–x, y, 1/2–z; (e) = x, 1+y, 1/2–z; (f) = –x, 1+y, 1/2–z.

**Table S3** Hydrogen-bonding interactions in **4**<sup>a,b</sup>

| D–H···A        | D···A/Å   |
|----------------|-----------|
| O(1W)···O(2Wc) | 2.845(11) |
| O(1W)···O(9c)  | 3.093(10) |
| O(1W)···O(4d)  | 2.764(9)  |
| O(2W)···O(8)   | 2.745(9)  |
| O(2W)···O(1Wc) | 2.845(11) |
| O(2W)···O(9c)  | 2.668(11) |
| O(3W)···O(2)   | 3.169(9)  |
| O(3W)···O(3a)  | 2.925(10) |
| O(3W)···O(9b)  | 2.918(11) |

<sup>a</sup> D = Donor, A = Acceptor. <sup>b</sup> Symmetry codes: (a) = –x+1/2, y–1/2, –z+1/2; (b) = –x, –y+1, –z; (c) = 1–x, 1–y, –z; (d) = 1/2+x, 3/2–y, –1/2+z.
